# Supplementary material
Source: HighWire-hosted journal article supplement (http://ajnr-stage2.highwire.org/highwire/filestream/72727/field_highwire_adjunct_files/0/19-00981.pdf)
Supplement: 19-00981.pdf [file 19-00981.pdf]

**On-line Table: Mean difference and MAE between final infarct using DWI and FLAIR and predicted infarct using automatic Vitrea CTP software**

| Parameter/Final Infarct Predictor | Automatic Perfusion Software | Endovascular Intervention | Nonintervention |
|-----------------------------------|------------------------------|---------------------------|-----------------|
| Mean infarct difference (mL)      | DWI                          |                           |                 |
|                                   | Default Vitrea               | -6.1                      | -14.2           |
|                                   | CBV Vitrea                   | 2.5                       | -20.4           |
| FLAIR                             | CBF Vitrea                   | 14.1                      | -7.2            |
|                                   | Default Vitrea               | -6.6                      | -12.0           |
|                                   | CBV Vitrea                   | 2.0                       | -12.3           |
|                                   | CBF Vitrea                   | 12.2                      | -5.0            |
| Mean absolute error (mL)          | DWI                          |                           |                 |
|                                   | Default Vitrea               | 20.2                      | 18.7            |
|                                   | CBV Vitrea                   | 17.0                      | 39.8            |
| FLAIR                             | CBF Vitrea                   | 20.4                      | 15.3            |
|                                   | Default Vitrea               | 19.7                      | 19.2            |
|                                   | CBV Vitrea                   | 16.4                      | 24.2            |
|                                   | CBF Vitrea                   | 20.3                      | 16.7            |

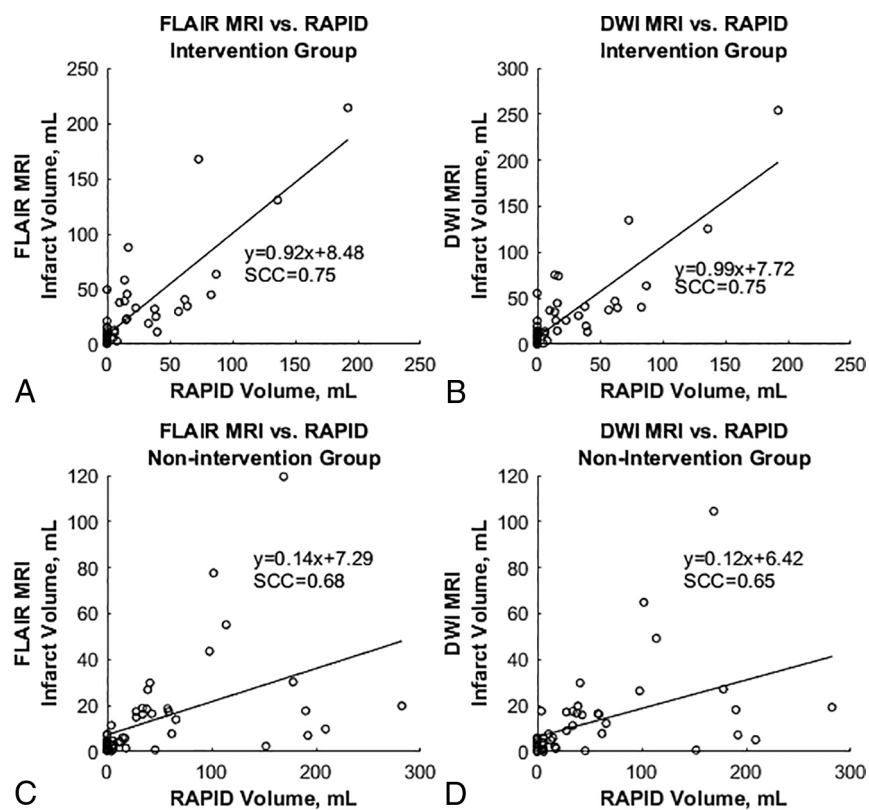

**ON-LINE FIG 1.** The regression and correlation between final DWI and FLAIR infarct and predicted CTP infarct volumes. A and B, Relationship between final and predicted infarct volumes for intervention cases. C and D, The same relationship for nonintervention cases.

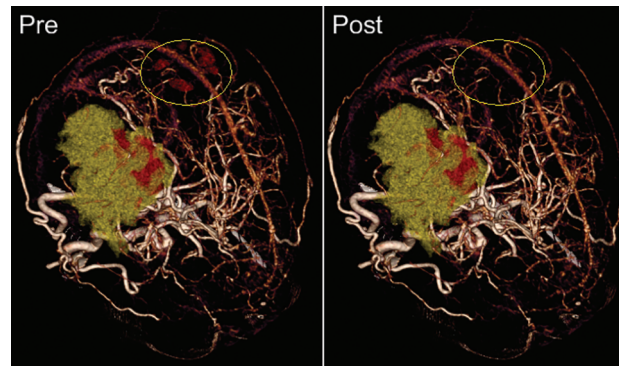

**ON-LINE FIG 2.** The location of detected infarct (red) and penumbra (yellow) tissue in a patient with an intervention, using the default Vitrea setting. The Pre image indicates the automatic detection of infarct and penumbra tissue, and within the yellow ROI, there is an erroneous infarct generated at the top of the skull. The Post image indicates the elimination of this erroneous infarct detection after user segmentation of the stroke region using the Vitrea built-in segmentation tool.
